# Supplementary material for: Lipidomic characterisation discovery for coronary heart disease diagnosis based on high-throughput ultra-performance liquid chromatography and mass spectrometry
Source: PubMed Central journal article supplement (PMC9076928; doi:10.1039/c7ra09353e), 2018-01-02
Supplement: RA-008-C7RA09353E-s001.pdf [file RA-008-C7RA09353E-s001.pdf]

Supplementary table 1 Information of the characterized lipids in serum samples of CHD patients

| No | Rt (min) | M/Z      | Description                           | Ion mode | Formula     | PPM  | ID           |
|----|----------|----------|---------------------------------------|----------|-------------|------|--------------|
| 1  | 7.28     | 279.2326 | Bovinic acid                          | M-H      | C18H32O2    | -1.4 | LMFA01030118 |
| 2  | 6.92     | 327.2326 | DHA                                   | M-H      | C22H32O2    | -1.2 | LMFA01030185 |
| 3  | 1.96     | 201.1125 | Sebacic acid                          | M-H      | C10H18O4    | -3.8 | LMFA01170006 |
| 4  | 4.42     | 319.2277 | 5,6-Epoxy-8,11,14-eicosatrienoic acid | M-H      | C20H32O3    | -0.5 | LMFA03080002 |
| 5  | 2.64     | 316.2482 | O-decanoyl-R-carnitine                | M+H      | C17H33NO4   | -0.2 | LMFA07070006 |
| 6  | 6.75     | 256.2656 | Palmitamide                           | M+H      | C16H33NO    | 3.1  | LMFA08010009 |
| 7  | 1.86     | 742.5402 | PC(15:0/18:2(9Z,12Z))                 | M-H      | C41H78NO8P  | 1.3  | LMGP01010543 |
| 8  | 7.93     | 808.5854 | PC(18:0/20:5(5Z,8Z,11Z,14Z,17Z))      | M+H      | C46H82NO8P  | 0.4  | LMGP01010805 |
| 9  | 5.96     | 480.3112 | LysoPC(15:0)                          | M-H      | C23H48NO7P  | 3.5  | LMGP01050016 |
| 10 | 5.64     | 524.3733 | LysoPC(18:0)                          | M+H      | C26H54NO7P  | 4.2  | LMGP01050026 |
| 11 | 1.37     | 520.3338 | LysoPC(18:2(9Z,12Z))                  | M+H      | C26H50NO7P  | -1.4 | LMGP01050035 |
| 12 | 3.65     | 518.3272 | LysoPC(18:3(9Z,12Z,15Z))              | M+H      | C26H48NO7P  | 0.9  | LMGP01050038 |
| 13 | 4.04     | 544.3444 | LysoPC(20:4(5Z,8Z,11Z,14Z))           | M+H      | C28H50NO7P  | 3.4  | LMGP01050048 |
| 14 | 5.11     | 548.3739 | LysoPC(20:2(11Z,14Z))                 | M+H      | C28H54NO7P  | 5.3  | LMGP01050132 |
| 15 | 4.54     | 522.3593 | LysoPC(18:1(11Z))                     | M+H      | C26H52NO7P  | 0.4  | LMGP01050138 |
| 16 | 4.43     | 546.3596 | LysoPC(20:3(5Z,8Z,11Z))               | M+H      | C28H52NO7P  | 1.6  | LMGP01050139 |
| 17 | 6.44     | 510.3936 | LysoPC(O-18:0)                        | M+H      | C26H56NO6P  | 3.6  | LMGP01060014 |
| 18 | 4.79     | 480.3459 | PC(P-16:0/0:0)                        | M+H      | C24H50NO6P  | 2.2  | LMGP01070006 |
| 19 | 7.93     | 760.5878 | PE(15:0/22:1(11Z))                    | M+H      | C42H82NO8P  | 3.6  | LMGP02010470 |
| 20 | 1.89     | 758.5719 | PE(15:0/22:2(13Z,16Z))                | M+H      | C42H80NO8P  | 3.2  | LMGP02010471 |
| 21 | 4.43     | 452.2788 | PE(16:0/0:0)                          | M-H      | C21H44NO7P  | 1.2  | LMGP02050002 |
| 22 | 4.74     | 478.2959 | LysoPE(0:0/18:1(11Z))                 | M-H      | C23H46NO7P  | 4.1  | LMGP02050039 |
| 23 | 4.4      | 502.2951 | LysoPE(0:0/20:3(8Z,11Z,14Z))          | M-H      | C25H46NO7P  | 2.4  | LMGP02050050 |
| 24 | 4.76     | 436.2848 | PE(P-16:0/0:0)                        | M-H      | C21H44NO6P  | 3.3  | LMGP02070001 |
| 25 | 3.86     | 595.2911 | PI(18:2(9Z,12Z)/0:0)                  | M-H      | C27H49O12P  | 3.6  | LMGP06050010 |
| 26 | 4.69     | 457.2369 | PA(20:4(5Z,8Z,11Z,14Z)/0:0)           | M-H      | C23H39O7P   | 1.8  | LMGP10050013 |
| 27 | 4.48     | 409.2396 | LPA(0:0/16:0)                         | M-H      | C19H39O7P   | 3.7  | LMGP10050042 |
| 28 | 3.39     | 302.3066 | Sphinganine                           | M+H      | C18H39NO2   | 4.2  | LMSP01020001 |
| 29 | 3.89     | 564.5312 | Ceramide (d18:1/18:0)                 | M-H      | C36H71NO3   | -3.8 | LMSP02010006 |
| 30 | 7.94     | 813.6754 | SM(d18:1/24:1(15Z))                   | M+H      | C47H93N2O6P | -1.1 | LMSP03010007 |
| 31 | 7.29     | 731.6023 | SM(d18:0/18:1(9Z))                    | M+H      | C41H83N2O6P | -3.2 | LMSP03010031 |
| 32 | 2.87     | 801.6783 | SM(d18:1/23:0)                        | M+H      | C46H93N2O6P | -2.6 | LMSP0301078  |
| 33 | 2.59     | 806.5641 | Lactosylceramide (d18:1/12:0)         | M+H      | C42H79NO13  | 2.0  | LMSP0501AB02 |

Supplementary table 2 ROC analysis for the lipid metabolites.

| No | Description                           | AUROC | T-statistics | Log2 fold change |
|----|---------------------------------------|-------|--------------|------------------|
| 1  | Sphinganine                           | 0.894 | 9.30E-145    | -2.3345          |
| 2  | Sebacic acid                          | 0.88  | 4.41E-66     | -1.1697          |
| 3  | PCP-160/00                            | 0.867 | 3.15E-78     | -1.6938          |
| 4  | O-decanoyl-R-carnitine                | 0.852 | 2.87E-52     | 3.1174           |
| 5  | LPA00/160                             | 0.842 | 1.58E-79     | -1.0108          |
| 6  | LysoPC2045Z,8Z,11Z,14Z                | 0.828 | 9.25E-13     | -0.8536          |
| 7  | LysoPCO-180                           | 0.824 | 8.42E-55     | -1.6484          |
| 8  | Lactosylceramide d181/120             | 0.820 | 9.30E-40     | 2.4299           |
| 9  | LysoPC2035Z,8Z,11Z                    | 0.816 | 3.66E-09     | -0.9182          |
| 10 | SMd181/230                            | 0.806 | 1.41E-48     | 1.9188           |
| 11 | LysoPC18111Z                          | 0.797 | 1.96E-05     | -0.6092          |
| 12 | LysoPC20211Z,14Z                      | 0.761 | 5.54E-06     | -0.5584          |
| 13 | Palmitamide                           | 0.752 | 5.68E-66     | -2.1253          |
| 14 | PC150/1829Z,12Z                       | 0.731 | 6.45E-31     | 1.5293           |
| 15 | LysoPC180                             | 0.730 | 0.7134805    | -0.0569          |
| 16 | PEP-160/00                            | 0.729 | 8.43E-29     | -0.9149          |
| 17 | DHA                                   | 0.716 | 1.81E-24     | 0.6531           |
| 18 | PE160/00                              | 0.688 | 6.10E-03     | -0.1976          |
| 19 | LysoPE00/2038Z,11Z,14Z                | 0.688 | 9.10E-08     | -0.4071          |
| 20 | LysoPE00/18111Z                       | 0.683 | 5.43E-05     | -0.2634          |
| 21 | LysoPC1839Z,12Z,15Z                   | 0.669 | 7.87E-04     | -0.4013          |
| 22 | LysoPC150                             | 0.655 | 2.29E-02     | -0.1545          |
| 23 | 5,6-Epoxy-8,11,14-eicosatrienoic acid | 0.648 | 7.43E-14     | -0.9743          |
| 24 | PA2045Z,8Z,11Z,14Z/00                 | 0.639 | 1.65E-12     | 0.7070           |
| 25 | LysoPC1829Z,12Z                       | 0.625 | 7.87E-12     | 0.8179           |
| 26 | PE150/22213Z,16Z                      | 0.622 | 7.13E-14     | 0.9972           |
| 27 | SMd181/24115Z                         | 0.597 | 3.66E-04     | -0.2439          |
| 28 | Bovinic acid                          | 0.594 | 1.06E-06     | 0.3508           |
| 29 | PC180/2055Z,8Z,11Z,14Z,17Z            | 0.582 | 4.07E-02     | -0.1869          |
| 30 | Ceramide d181/180                     | 0.578 | 6.32E-05     | 0.4694           |
| 31 | PI1829Z,12Z/00                        | 0.571 | 7.24E-04     | 0.4160           |
| 32 | PE150/22111Z                          | 0.522 | 5.14E-01     | 0.1041           |
| 33 | SMd180/1819Z                          | 0.500 | 3.03E-04     | 0.5250           |
